# Supplementary material for: Remanufacturing transparent conductive oxide electrodes using ultrafast on-demand laser fabrication
Source: Royal Society of Chemistry journal article supplement (doi:10.1039/d3tc03563h), 2023-11-24
Supplement: d3tc03563h1.pdf [file d3tc03563h1.pdf]

## Electronic Supplementary Information

### Remanufacturing transparent conductive oxide electrodes using ultrafast on-demand laser fabrication

Tomohiko Nakajima,\* Junichi Nomoto, Yuuki Kitanaka and Iwao Yamaguchi

Advanced Manufacturing Research Institute, National Institute of Advanced Industrial Science and Technology, Tsukuba Central 5, 1-1-1 Higashi, Tsukuba, Ibaraki 305-8565, Japan.

#### Deposition methods of bottom electrodes before fabrications of ITO films

Two different methods of electrode formation were used for ITO film formation. For the test formation, a 250  $\mu\text{m}$  wide gap was formed by laser scribing with a DPSS laser after sputtering Au formation. For the remanufacturing demonstration, ITO was formed by sputtering ITO through a metal mask to form a wiring defect pattern model.

#### For testing fab.

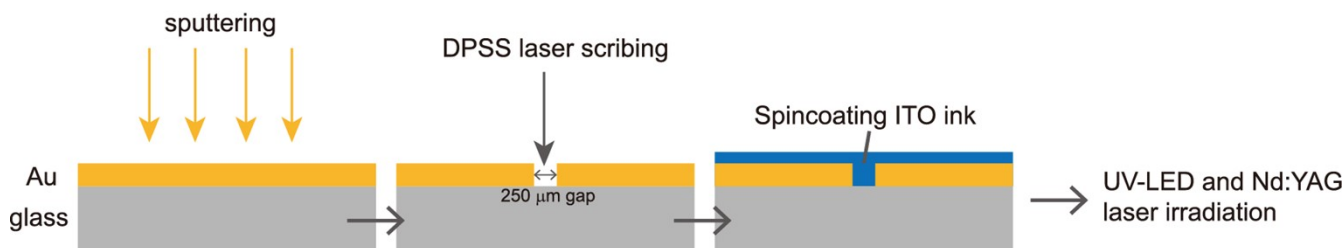

#### For remanufacturing demonstration

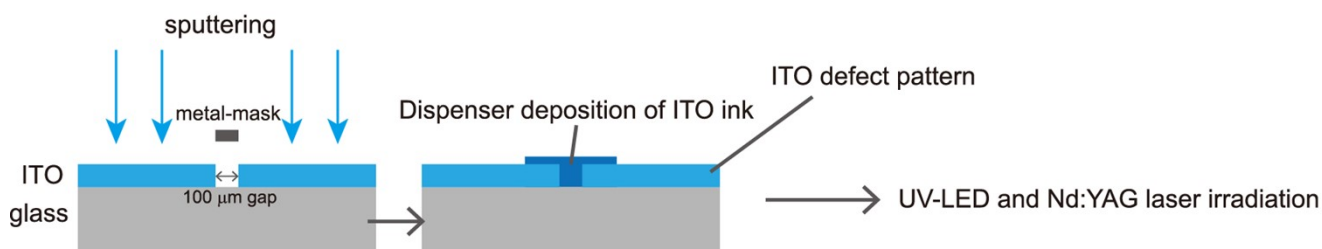

Fig. S1: Preparation procedures for testing fabrications and remanufacturing demonstration.
